# Supplementary material for: Antifungal Volatilomes Mediated Defense Mechanism against Fusarium oxysporum f. sp. lycopersici, the Incitant of Tomato Wilt
Source: MDPI journal article supplement (doi:10.3390/molecules27113631), 2022-06-06
Supplement: s1 [file s1]

## Supplementary data

**Figure S1. Morphological Characterization of Pathogen using olfactory chamber.**

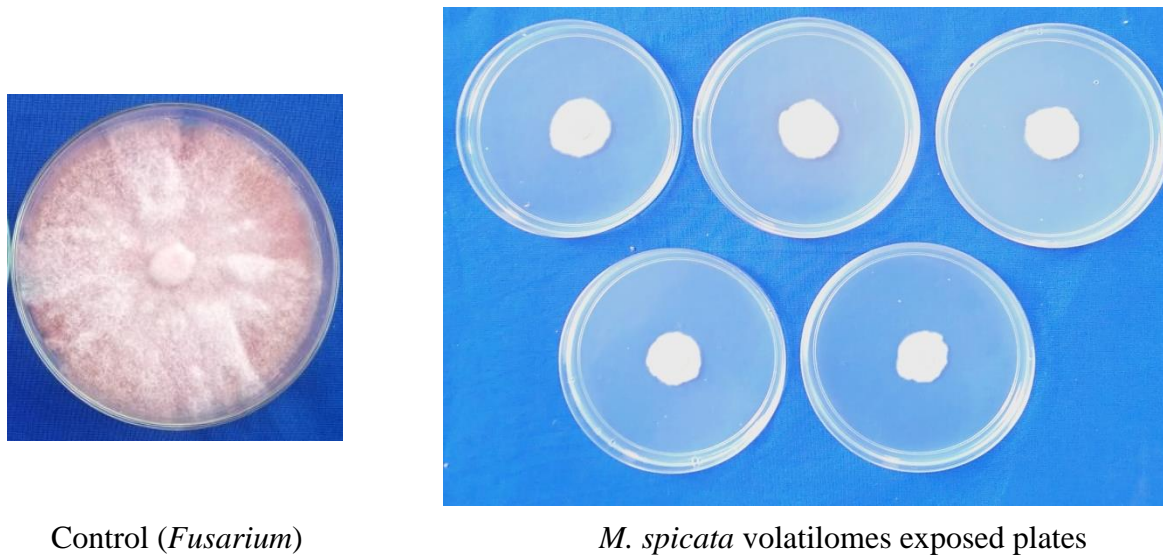

**Figure S2: GCMS chromatogram of headspace volatile compounds produced by the leaves of *Mentha spicata***

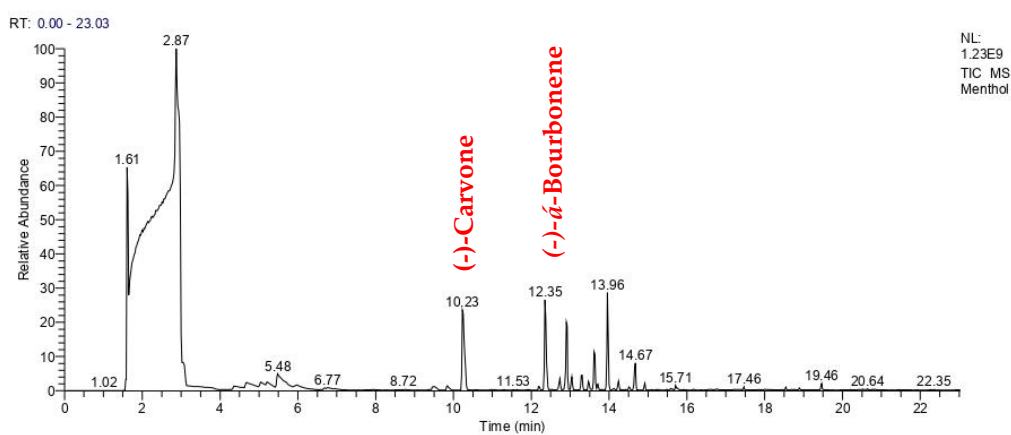

**Figure S3. Colony growth of *Fusarium oxysporum* (cfu) using PVC chamber**

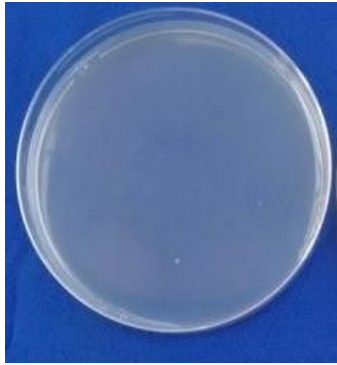

3<sup>rd</sup> dilution after exposure to 12 days of volatiles

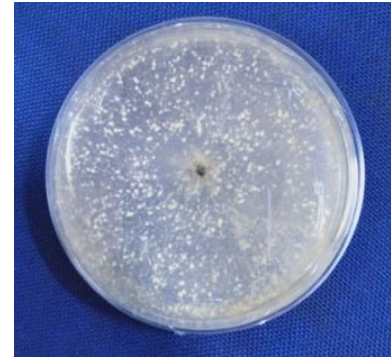

12<sup>th</sup> day without volatiles exposure

**Figure S4. Effect of Volatiles Immobilized Vermiculite Balls under Glass house Condition**

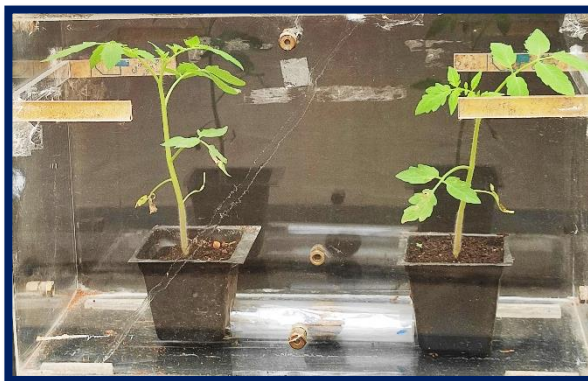

**a. *M. spicata* vermiculite ball exposed in pathogen inoculated pot**

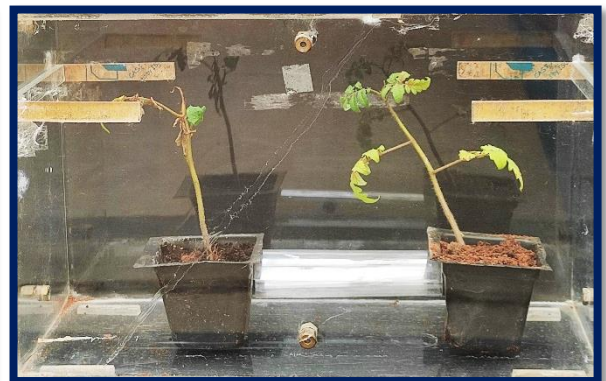

**b. Pathogen inoculated control**

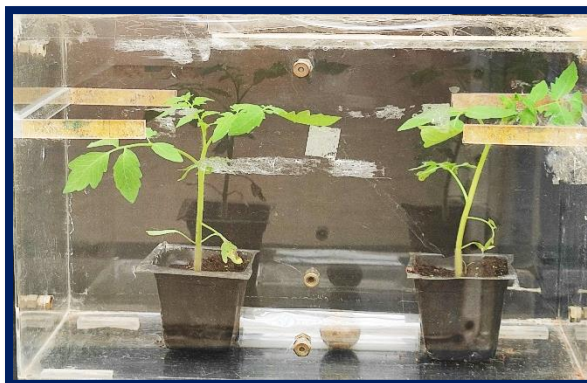

**c. Control without pathogen**

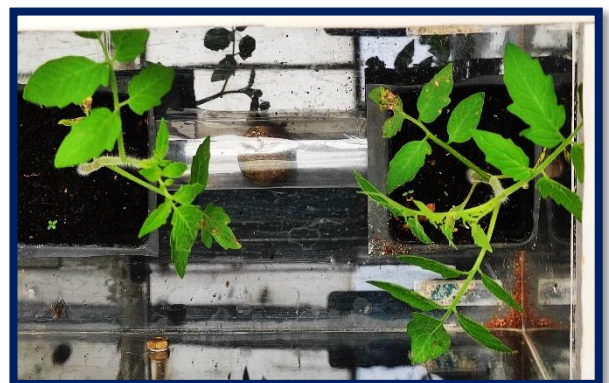

**d. Aerial view of Volatile Chamber**

**Table S1. Area Percent of carvone produced at different hours by the leaves of *M. spicata* immobilized vermiculite ball**

| Compound                                         | Hours      |            |            |             |             |             |            |            |             |
|--------------------------------------------------|------------|------------|------------|-------------|-------------|-------------|------------|------------|-------------|
|                                                  | 0          | 12         | 24         | 36          | 48          | 60          | 72         | 84         | 96          |
| Dodecane                                         | 0.069      | 0.02       | 0.021      | 0.31        | 0.028       | 0.26        | 0.021      | 0.078      | 0.36        |
| 2-Propanamine, N-(phenylmethylene)-              | 0.613      | 0.52       | 0.621      | 0.601       | 0.503       | 0.629       | 0.267      | 0.153      | 0.01        |
| <b>Carvone</b>                                   | <b>8.9</b> | <b>8.3</b> | <b>8.9</b> | <b>8.30</b> | <b>8.78</b> | <b>8.23</b> | <b>8.9</b> | <b>8.9</b> | <b>8.26</b> |
| 1-Pentanone,1-(1H-imidazol-4-yl)-                | 0.141      | 0.09       | 0.46       | 0.068       | 0.23        | 0.61        | 0.51       | 0.13       | 0.68        |
| 1-Cyclohexene-1-carboxaldehyde, 2,6,6-trimethyl- | 0.327      | 0.281      | 0.312      | 0.298       | 0.356       | 0.328       | 0.308      | 0.37       | 0.08        |
| (-)-Bourbonene                                   | 3.50       | 2.20       | 3.431      | 3.981       | 1.563       | 1.031       | 0.671      | 0.60       | 0.31        |
| p-Mentha-1,8-dien-7-ol                           | 0.283      | 0.286      | 0.368      | 0.407       | 0.48        | 0.512       | 0.238      | 0.73       | 0.17        |
| Tetradecane                                      | 0.278      | 0.163      | 0.261      | 0.387       | 0.08        | 0.32        | 0.810      | 0.28       | 0.89        |
| 3-hydroxy-2-methyl-5-cyclohexanone               | 0.192      | 0.17       | 0.213      | 0.298       | 0.198       | 0.094       | 0.230      | 0.02       | 0.29        |
| Bicyclo[3.2.1]octan-6-ol, exo-                   | 0.32       | 0.298      | 0.13       | 0.312       | 0.568       | 0.138       | 0.18       | 0.49       | 0.02        |
| Disulfide, di-tert-dodecyl                       | 0.116      | 0.094      | 0.004      | 0.098       | 0.319       | 0.275       | 0.063      | 0.11       | 0.08        |
| Heptacosane                                      | 0.259      | 0.237      | 0.78       | 0.624       | 0.0642      | 0.294       | 0.128      | 0.09       | 0.84        |
| Dodecane, 2,6,11-trimethyl-                      | 0.2        | 0.178      | 0.128      | 0.342       | 0.267       | 0.162       | 0.93       | 0.28       | 0.31        |
| Hexadecane                                       | 0.223      | 0.201      | 0.287      | 0.236       | 0.128       | 0.045       | 0.377      | 0.83       | 0.46        |
| Heptacosane                                      | 0.219      | 0.197      | 0.138      | 0.102       | 0.284       | 0.198       | 0.012      | 0.79       | 0.02        |
| Octadecane                                       | 0.98       | 0.958      | 0.871      | 0.231       | 0.328       | 0.249       | 0.73       | 2.13       | 0.231       |
| Eicosane, 2-methyl-                              | 0.155      | 0.133      | 0.05       | 0.094       | 0.194       | 0.00        | 0.059      | 0.17       | 0.04        |
| Dibutyl phthalate                                | 0.86       | 0.838      | 0.793      | 0.846       | 0.762       | 0.83        | 0.430      | 0.68       | 0.80        |
| Eicosane                                         | 0.115      | 0.093      | 0.16       | 0.267       | 0.197       | 0.23        | 0.20       | 0.065      | 0.427       |
| 2-methyloctacosane                               | 0.178      | 0.156      | 0.23       | 0.138       | 0.08        | 0.198       | 0.910      | 0.108      | 0.738       |
| Octadecane, 2-methyl-                            | 0.17       | 0.148      | 0.05       | 0.32        | 0.14        | 0.128       | 0.203      | 0.312      | 0.701       |
| Tetratetracontane                                | 0.34       | 0.318      | 0.36       | 0.216       | 0.287       | 0.321       | 0.72       | 0.04       | 0.25        |

**Table S2. GC-MS profiling of VOCs produced by leaves of *Cymbopogon citratus***

| <b>RT</b> | <b>Compound</b>                           | <b>Molecular formula</b>                                         | <b>Molecular weight</b> | <b>Relative area abundance</b> |
|-----------|-------------------------------------------|------------------------------------------------------------------|-------------------------|--------------------------------|
| 2.89      | Oxirane, 2-ethyl-2-methyl-                | C <sub>5</sub> H <sub>10</sub> O                                 | 86                      | 0.87                           |
| 4.75      | 2,2,4-Trimethyl-3-pentanol                | C <sub>8</sub> H <sub>17</sub> N                                 | 127                     | 0.38                           |
| 5.12      | Hydroperoxide, 1-ethylbutyl               | C <sub>6</sub> H <sub>14</sub> O <sub>2</sub>                    | 118                     | 0.34                           |
| 5.54      | Oxirane, butyl-                           | C <sub>6</sub> H <sub>12</sub> O                                 | 100                     | 0.72                           |
| 7.03      | 3-Carene                                  | C <sub>10</sub> H <sub>16</sub>                                  | 136                     | 0.05                           |
| 7.95      | 1,6-Octadien-3-ol, 3,7-dimethyl-          | C <sub>10</sub> H <sub>18</sub> O                                | 154                     | 0.07                           |
| 8.78      | Isopulegol                                | C <sub>10</sub> H <sub>18</sub> O                                | 154                     | 0.16                           |
| 9.97      | <b>Citronellol</b>                        | <b>C<sub>10</sub>H<sub>20</sub>O</b>                             | <b>156</b>              | <b>3.27</b>                    |
| 10.37     | Geraniol                                  | C <sub>10</sub> H <sub>18</sub> O                                | 154                     | 2.01                           |
| 11.02     | Geranyl vinyl ether                       | C <sub>12</sub> H <sub>20</sub> O                                | 180                     | 0.00                           |
| 12.13     | 2,6-Octadien-1-ol, 3,7-dimethyl-, acetate | C <sub>10</sub> H <sub>18</sub> O                                | 154                     | 1.20                           |
| 12.9      | Caryophyllene                             | C <sub>15</sub> H <sub>24</sub>                                  | 204                     | 0.13                           |
| 14.55     | ç-Muurolene                               | C <sub>15</sub> H <sub>24</sub>                                  | 204                     | 0.09                           |
| 15.32     | à-acorenol                                | C <sub>15</sub> H <sub>26</sub> O                                | 222                     | 0.00                           |
| 15.59     | 4-epi-cubedol                             | C <sub>22</sub> H <sub>32</sub> O <sub>2</sub>                   | 328                     | 0.63                           |
| 16.22     | Cubedol                                   | C <sub>23</sub> H <sub>22</sub> O <sub>6</sub>                   | 394                     | 0.03                           |
| 16.79     | à-Cadinol                                 | C <sub>15</sub> H <sub>26</sub> O                                | 222                     | 0.13                           |
| 17.46     | Benzoic acid, 2-ethylhexyl ester          | C <sub>15</sub> H <sub>22</sub> O <sub>2</sub>                   | 234                     | 0.18                           |
| 17.97     | Geranyl isovalerate                       | C <sub>15</sub> H <sub>26</sub> O <sub>2</sub>                   | 238                     | 0.04                           |
| 18.54     | Octadecane                                | C <sub>18</sub> H <sub>38</sub>                                  | 254                     | 0.04                           |
| 18.54     | Heptacosane                               | C <sub>20</sub> H <sub>60</sub> O <sub>10</sub> Si <sub>10</sub> | 740                     | 0.04                           |
| 19.05     | Phytol, acetate                           | C <sub>22</sub> H <sub>42</sub> O <sub>2</sub>                   | 338                     | 0.24                           |
| 19.46     | Dibutyl phthalate                         | C <sub>16</sub> H <sub>22</sub> O <sub>4</sub>                   | 278                     | 0.16                           |
| 19.93     | Betulin                                   | C <sub>30</sub> H <sub>50</sub> O <sub>2</sub>                   | 442                     | 0.03                           |
| 21.48     | Ethyl iso-allocholate                     | C <sub>26</sub> H <sub>44</sub> O <sub>5</sub>                   | 436                     | 0.01                           |
| 22.62     | Cyclodecasiloxane, eicosamethyl-          | C <sub>20</sub> H <sub>60</sub> O <sub>10</sub> Si <sub>10</sub> | 740                     | 0.03                           |
